# Supplementary figures and images for: Quercetin attenuates deoxynivalenol-induced intestinal barrier dysfunction by activation of Nrf2 signaling pathway in IPEC-J2 cells and weaned piglets
Source: PubMed Central journal article supplement — Curr Res Toxicol. 2023 Sep 6;5:100122. doi: 10.1016/j.crtox.2023.100122 (PMC10500468; doi:10.1016/j.crtox.2023.100122), 2023-09-06

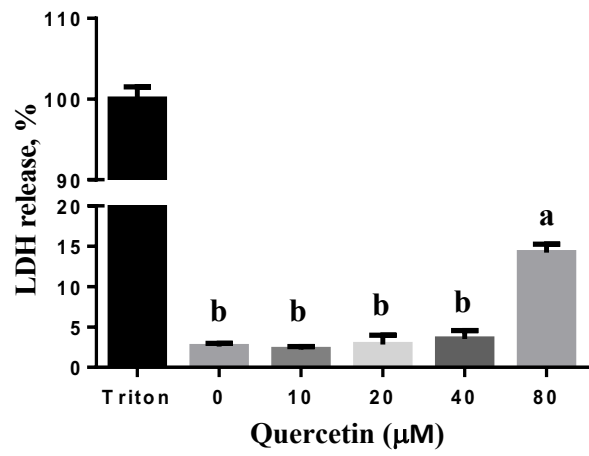

Supplement: mmc1.pdf [file mmc1.pdf]
